# Supplementary material for: Fusarium musae from Diseased Bananas and Human Patients: Susceptibility to Fungicides Used in Clinical and Agricultural Settings
Source: MDPI journal article supplement (doi:10.3390/jof7090784), 2021-09-21

## Supplementary

Figure S1. Figure 1. PCR amplification with primers Fvh55 and Fvh59. Successful amplification of the fumonisin gene cluster excision site ( $\Delta$ FGC) represents the inability of the strain to produce the toxin fumonisin, a characteristic trait of *F. musae* species. If amplification occurs (1178 bp) the cluster is not present. Loading order is: (1) IUM11-0507, (2) IUM11-0508, (3) IUM09-1037 and (4) F31; (5) *Ciborinia camelliae* ITAC2 (negative control), (6) water. Marker 1kb on the left.

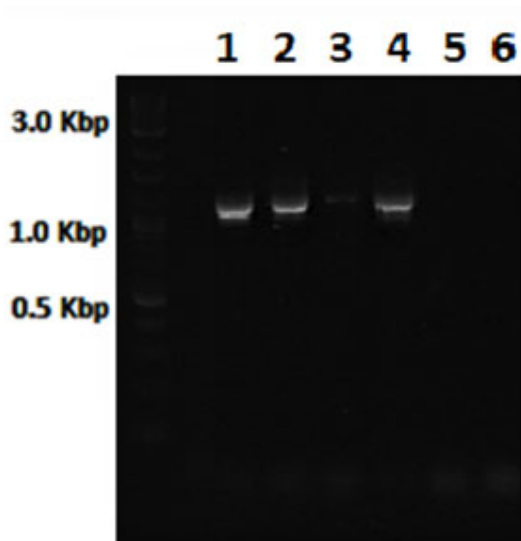

Supplement: s1 [file s1]
