# Supplementary material for: Fusarium musae from Diseased Bananas and Human Patients: Susceptibility to Fungicides Used in Clinical and Agricultural Settings
Source: MDPI journal article supplement (doi:10.3390/jof7090784), 2021-09-21
Supplement: s1 [file s1]

Table S1

Bayesian independent Mann-Whitney t-test calculated on the differential response of strains originating from banana fruits and human patients.

|                         | <b>BF<sub>10</sub></b> | <b>W</b> | <b>R<sup>^</sup></b> |
|-------------------------|------------------------|----------|----------------------|
| ITRA                    | 0.530                  | 51.00    | 1.000                |
| VORI                    | 0.475                  | 52.00    | 1.000                |
| POSA                    | 0.472                  | 36.00    | 1.000                |
| ISAV                    | 0.542                  | 52.50    | 1.000                |
| AMB                     | 0.474                  | 39.00    | 1.001                |
| EPOXICONAZ              | 0.587                  | 56.00    | 1.000                |
| DIFENOCONAZ             | 3.988                  | 78.50    | 1.000                |
| PROPICONAZ              | 1.911                  | 69.50    | 1.001                |
| TETRACONAZ              | 1.076                  | 64.00    | 1.001                |
| FLUSILAZ                | 0.540                  | 51.50    | 1.001                |
| FENBUCONAZ              | 1.291                  | 69.50    | 1.000                |
| * PROCHLORAZ/ TEBUCONAZ | -                      | -        | -                    |

*Note.* Result based on data augmentation algorithm with 5 chains of 1000 iterations.

\*The variance in PROCHLORAZ and TEBUCONAZ is equal to 0 after grouping based on origin of the sample
